# Supplementary material
Source: PubMed Central journal article supplement (PMC11229418)
Supplement: NIHMS1882190-supplement-Supplementary_Information.pdf [file NIHMS1882190-supplement-Supplementary_Information.pdf]

Supplementary Figures

**a** Spinal cord tangential slice (CX3CR1-GCaMP5g-tdTomato) **b**

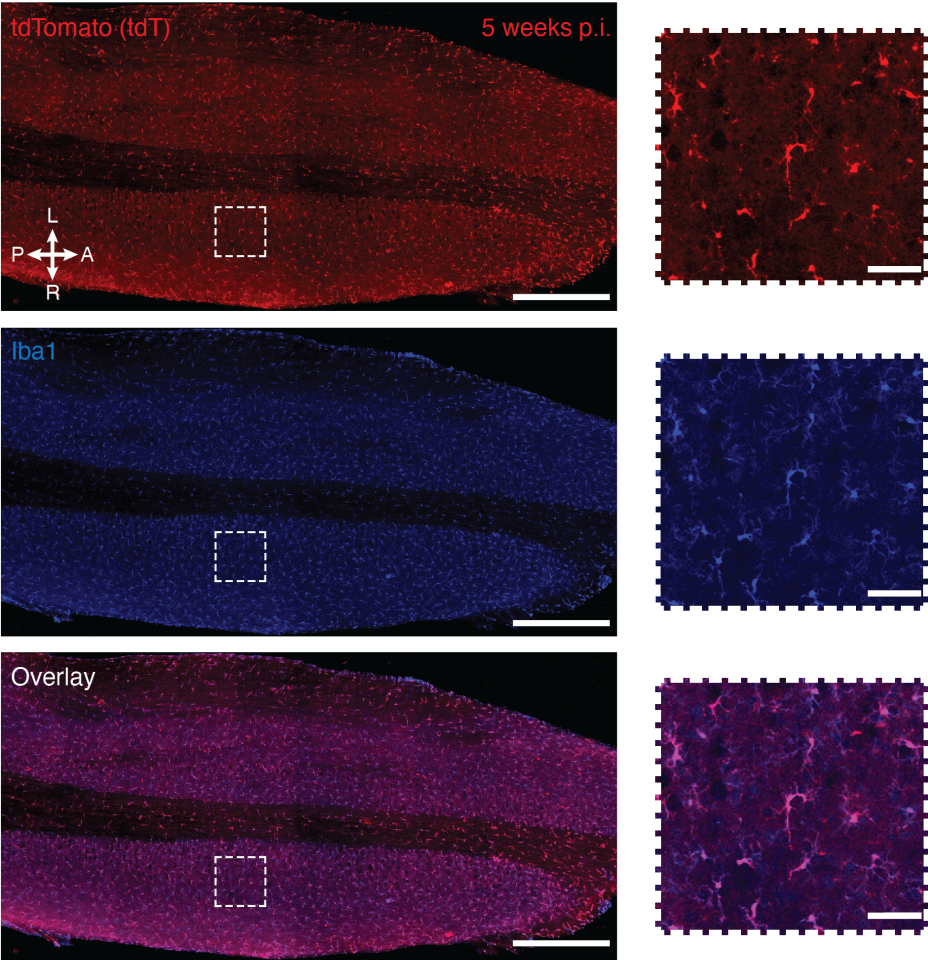

**c** Recombination efficiency and specificity

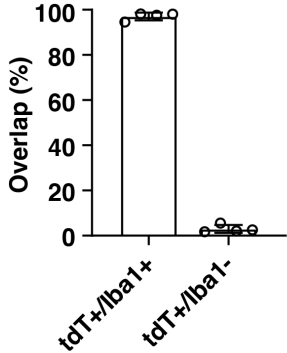

Supplementary Fig. 1 | See next page for caption.

**Supplementary Fig. 1 | Conditional indicator expression in spinal microglia of CX3CR1-GCaMP5g-tdTomato mice.** **a**, Fluorescence images of a tangential spinal cord section (50  $\mu$ m thickness including the dorsal surface) from a CX3CR1-GCaMP5g-tdTomato mouse five weeks after Tamoxifen injection (**Methods**). *Top*, tdTomato (tdT) expression. *Center*, Iba1 immunostain. *Bottom*, overlay. Scale bars, 500  $\mu$ m. **b**, Zoom-ins of the indicated regions in **a**. Scale bars, 50  $\mu$ m. **c**, Population analysis of conditional indicator expression extent (tdT-positive/Iba1-positive cells) and specificity (tdTomato-positive/Iba1-negative cells). The data are from two representative mice and two tissue sections per animal presented as the mean  $\pm$  s.e.m.

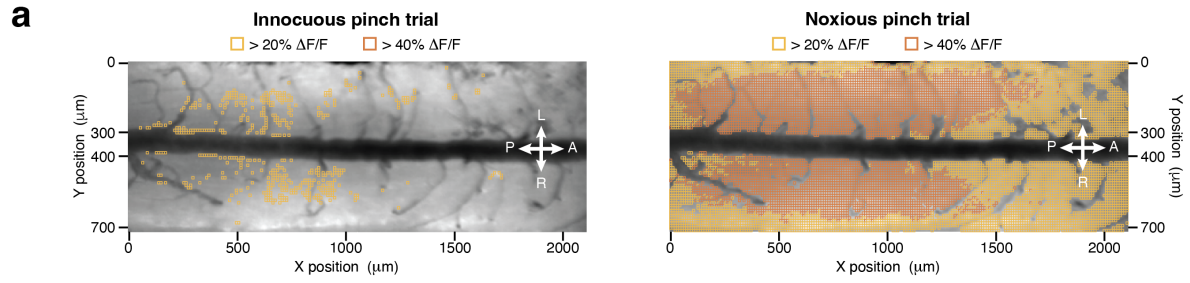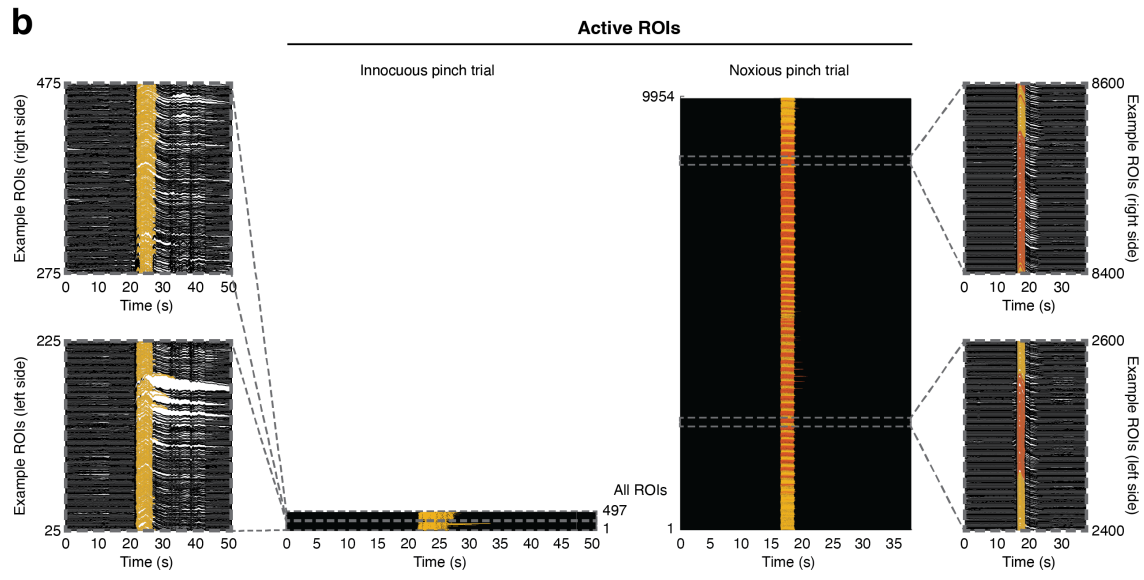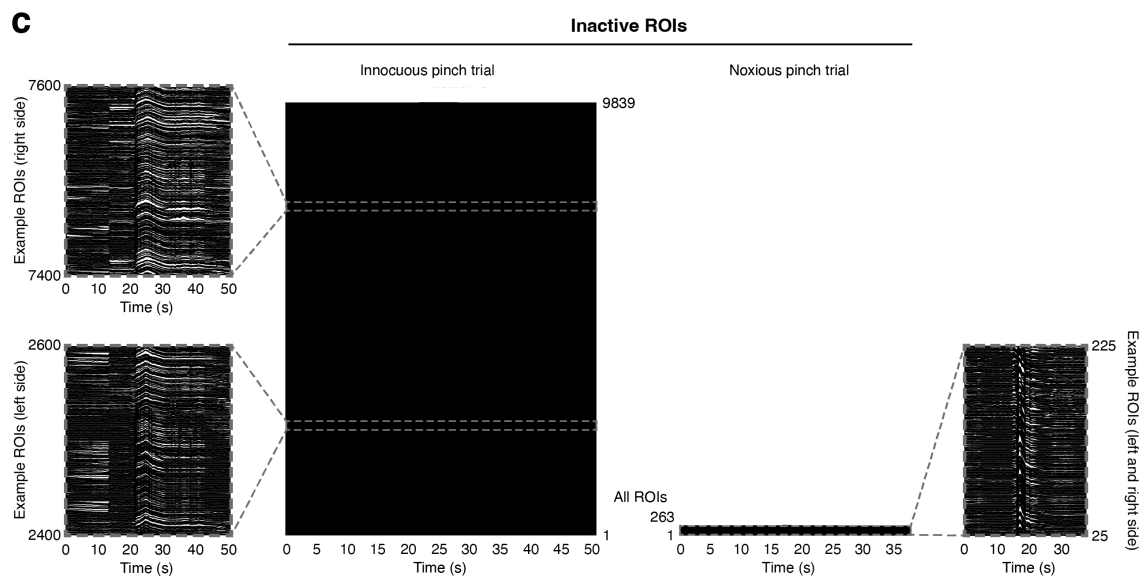

**Supplementary Fig. 2 | See next page for caption.**

**Supplementary Fig. 2 | High-speed trans-segmental imaging of sensory-evoked calcium activity in focally restrained behaving GFAP-GCaMP6f mice.** **a**, Activity maps for the innocuous ( $p < 200$  g) and noxious pinch trials ( $p > 500$  g) of **Fig. 2** from the same focally restrained animal. **b**, All active ROI calcium transients (defined as  $>20\%$   $\Delta F/F$  and  $>6$  s.d. above baseline; **Methods**) from the innocuous (center left) and noxious pinch trials (center right) in **a**. The ROI transients are ordered line by line according to their X and Y positions, starting from the top left. Each zoom-in shows 200 calcium transients from the left and right sides of the spinal cord in more detail. **c**, All inactive ROI transients (defined as  $<20\%$   $\Delta F/F$  or  $<6$  s.d. above baseline; **Methods**) from the innocuous (center left) and noxious pinch trials (center right) in **a**. Each zoom-in shows 200 transients. Locomotion (**Extended Data Fig. 8**) and blood vessel diameter changes (**Supplementary Videos 6-7**) can cause artifactual transients. Of the 9,839 inactive innocuous pinch trial transients, 85.4% and 14.6% were  $<20\%$   $\Delta F/F$  or  $<6$  s.d. above baseline, respectively. Of the 263 inactive noxious pinch trial transients, 11.4% and 88.6% were  $<20\%$   $\Delta F/F$  or  $<6$  s.d. above baseline, respectively.

## Supplementary Tables

| Surface | Type     | Radius    | Thickness | Glass    | Diameter |
|---------|----------|-----------|-----------|----------|----------|
| OBJ     | STANDARD | Infinity  | 0.40000   | N-BK7    | 6.00000  |
| 1       | STANDARD | Infinity  | 3.83988   |          | 5.95166  |
| 2       | STANDARD | -5.74334  | 1.60002   | N-SF66   | 5.36800  |
| 3       | STANDARD | 15.70964  | 0.81873   |          | 6.41800  |
| 4       | STANDARD | -32.74580 | 1.60104   | S-LAH97  | 6.89400  |
| 5       | STANDARD | -8.05357  | 0.21700   |          | 7.61200  |
| 6       | STANDARD | Infinity  | 1.60035   | N-LAF34  | 8.46000  |
| 7       | STANDARD | -12.51519 | 0.52205   |          | 8.77400  |
| 8       | STANDARD | 21.51710  | 1.60150   | S-LAH55V | 9.00000  |
| 9       | STANDARD | -47.46657 | 0.50000   |          | 9.00000  |
| 10      | STANDARD | Infinity  | 1.00000   | FSILICA  | 8.92000  |
| 11      | STANDARD | Infinity  | 5.50000   |          | 8.81600  |
| 12      | COORDBRK | -         | 0.00000   |          | -        |
| 13      | STANDARD | Infinity  | 0.00000   | MIRROR   | 12.21416 |
| 14      | COORDBRK | -         | 5.50000   |          | -        |
| STO     | STANDARD | -33.34728 | 1.98940   | S-LAH97  | 7.12400  |
| 16      | STANDARD | 6.13755   | 1.00000   | N-SF66   | 7.23800  |
| 17      | STANDARD | 17.95736  | 0.10000   |          | 7.75400  |
| 18      | STANDARD | -6.35500  | 1.89487   | S-LAH58  | 8.06200  |
| 19      | STANDARD | -35.88850 | 1.60925   |          | 7.63800  |
| 20      | STANDARD | Infinity  | 0.74100   |          | 6.07952  |
| 21      | STANDARD | 15.94777  | 0.99962   | N-SF66   | 5.53400  |
| 22      | STANDARD | -21.55705 | 2.80317   |          | 5.09800  |
| 23      | STANDARD | Infinity  | 0.10000   | N-BK7    | 4.08338  |
| IMA     | STANDARD | Infinity  |           |          | 4.05844  |

**Supplementary Table 1 | Wearable microscope optical design.** The specified values reflect the optical model parameters. For design tolerances and tolerancing analysis, see **Supplementary Tables 2-3**.

| <b>Operand</b> | <b>Surface</b> | <b>Nominal</b> | <b>Min.</b> | <b>Max.</b> |
|----------------|----------------|----------------|-------------|-------------|
| COMP           | 19             | 0.037          | -0.5        | 0.5         |
| TWAV           | -              | -              | 0.6328      | -           |
| TFRN           | 2              | 0              | -5          | 5           |
| TFRN           | 3              | 0              | -5          | 5           |
| TFRN           | 4              | 0              | -5          | 5           |
| TFRN           | 5              | 0              | -5          | 5           |
| TFRN           | 6              | 0              | -5          | 5           |
| TFRN           | 7              | 0              | -5          | 5           |
| TFRN           | 8              | 0              | -4          | 4           |
| TFRN           | 9              | 0              | -4          | 4           |
| TFRN           | 12             | 0              | -5          | 5           |
| TFRN           | 13             | 0              | -5          | 5           |
| TFRN           | 14             | 0              | -4          | 4           |
| TFRN           | 15             | 0              | -5          | 5           |
| TFRN           | 16             | 0              | -4          | 4           |
| TFRN           | 17             | 0              | -5          | 5           |
| TFRN           | 18             | 0              | -5          | 5           |
| TTHI           | 2              | 1.6            | -5.00E-03   | 5.00E-03    |
| TTHI           | 3              | 0.8187         | -5.00E-03   | 5.00E-03    |
| TTHI           | 4              | 1.601          | -0.025      | 0.025       |
| TTHI           | 5              | 0.217          | -1.00E-02   | 1.00E-02    |
| TTHI           | 6              | 1.6003         | -0.025      | 0.025       |
| TTHI           | 7              | 0.5221         | -0.025      | 0.025       |
| TTHI           | 8              | 1.6015         | -0.025      | 0.025       |
| TTHI           | 9              | 0.5            | -0.025      | 0.025       |
| TTHI           | 12             | 1.9894         | -0.025      | 0.025       |
| TTHI           | 13             | 1              | -0.025      | 0.025       |
| TTHI           | 14             | 0.1            | -5.00E-03   | 5.00E-03    |
| TTHI           | 15             | 1.8949         | -1.00E-02   | 1.00E-02    |
| TTHI           | 16             | 2.3502         | -5.00E-03   | 5.00E-03    |
| TTHI           | 17             | 0.9996         | -0.025      | 0.025       |
| TIRR           | 2              | 0              | -1          | 1           |
| TIRR           | 3              | 0              | -1          | 1           |
| TIRR           | 4              | 0              | -1          | 1           |
| TIRR           | 5              | 0              | -1          | 1           |
| TIRR           | 6              | 0              | -1          | 1           |
| TIRR           | 7              | 0              | -1          | 1           |
| TIRR           | 8              | 0              | -1          | 1           |
| TIRR           | 9              | 0              | -1          | 1           |
| TIRR           | 12             | 0              | -1          | 1           |
| TIRR           | 13             | 0              | -1          | 1           |
| TIRR           | 14             | 0              | -1          | 1           |
| TIRR           | 15             | 0              | -1          | 1           |
| TIRR           | 16             | 0              | -1          | 1           |
| TIRR           | 17             | 0              | -1          | 1           |

|      |    |   |           |          |
|------|----|---|-----------|----------|
| TIRR | 18 | 0 | -1        | 1        |
| TIRX | 2  | 0 | -1.00E-02 | 1.00E-02 |
| TIRX | 3  | 0 | -5.00E-03 | 5.00E-03 |
| TIRX | 4  | 0 | -5.00E-03 | 5.00E-03 |
| TIRX | 5  | 0 | -1.00E-02 | 1.00E-02 |
| TIRX | 6  | 0 | -5.00E-03 | 5.00E-03 |
| TIRX | 7  | 0 | -1.00E-02 | 1.00E-02 |
| TIRX | 8  | 0 | -5.00E-03 | 5.00E-03 |
| TIRX | 9  | 0 | -5.00E-03 | 5.00E-03 |
| TIRX | 12 | 0 | -1.00E-02 | 1.00E-02 |
| TIRX | 13 | 0 | -1.00E-02 | 1.00E-02 |
| TIRX | 14 | 0 | -5.00E-03 | 5.00E-03 |
| TIRX | 15 | 0 | -1.00E-02 | 1.00E-02 |
| TIRX | 16 | 0 | -5.00E-03 | 5.00E-03 |
| TIRX | 17 | 0 | -5.00E-03 | 5.00E-03 |
| TIRX | 18 | 0 | -5.00E-03 | 5.00E-03 |
| TIRY | 2  | 0 | -1.00E-02 | 1.00E-02 |
| TIRY | 3  | 0 | -5.00E-03 | 5.00E-03 |
| TIRY | 4  | 0 | -5.00E-03 | 5.00E-03 |
| TIRY | 5  | 0 | -1.00E-02 | 1.00E-02 |
| TIRY | 6  | 0 | -5.00E-03 | 5.00E-03 |
| TIRY | 7  | 0 | -1.00E-02 | 1.00E-02 |
| TIRY | 8  | 0 | -5.00E-03 | 5.00E-03 |
| TIRY | 9  | 0 | -5.00E-03 | 5.00E-03 |
| TIRY | 12 | 0 | -1.00E-02 | 1.00E-02 |
| TIRY | 13 | 0 | -1.00E-02 | 1.00E-02 |
| TIRY | 14 | 0 | -5.00E-03 | 5.00E-03 |
| TIRY | 15 | 0 | -1.00E-02 | 1.00E-02 |
| TIRY | 16 | 0 | -5.00E-03 | 5.00E-03 |
| TIRY | 17 | 0 | -5.00E-03 | 5.00E-03 |
| TIRY | 18 | 0 | -5.00E-03 | 5.00E-03 |

**Supplementary Table 2 | Wearable macroscope optical design tolerances.** Abbreviations: COMP, moves the object plane to find the best focus before calculating RMS spot radius. Units are in mm. In real-world applications, the device is placed at the best focus. TWAV, is the test wavelength (632.8 nm). Although this wavelength is outside our lens system's achromatic range, it is matched to the lens fabricator's metrology interferometer, which uses a HeNe laser. Note that the HeNe laser has an extremely narrow bandwidth (0.002 nm) and, therefore, chromatic aberration is negligible during metrology. TFRN, is the radius of curvature tolerance defined in fringes. TTHI, is the thickness tolerance of both the glass and air spaces defined in mm. TIRR, is the surface irregularity tolerance (i.e., the deviation from, in our case, a spherical surface profile) defined in fringes. TIRX and TIRY, are x- and y-axis tolerances, respectively, on the surface wedge (i.e., the surface tilt between the two surfaces of a lens), defined as twice the sag in mm. Because our lens system is radially symmetric, the x- and y-axis wedge tolerances are the same for every surface.

| Condition | Distance from FOV center (mm): | ±0   | ±0.8 | ±1.4 | ±1.6 | ±2   |
|-----------|--------------------------------|------|------|------|------|------|
| Nominal   |                                | 2.13 | 2.76 | 3.38 | 4.37 | 7.81 |
| Best      | (Trial 2,293)                  | 1.97 | 2.37 | 3.02 | 3.86 | 6.50 |
| Worst     | (Trial 8,009)                  | 6.99 | 7.80 | 7.47 | 7.81 | 11.6 |
| Mean      |                                | 2.88 | 3.56 | 3.98 | 4.85 | 8.09 |
| Std. dev. |                                | 0.62 | 0.70 | 0.55 | 0.47 | 0.63 |
| Yield     |                                |      |      |      |      |      |
| 98%       |                                | 4.56 | 5.47 | 5.52 | 6.06 | 9.64 |
| 90%       |                                | 3.71 | 4.49 | 4.70 | 5.47 | 8.92 |
| 80%       |                                | 3.31 | 4.04 | 4.34 | 5.20 | 8.58 |
| 50%       |                                | 2.72 | 3.39 | 3.86 | 4.77 | 8.02 |
| 20%       |                                | 2.37 | 2.99 | 3.54 | 4.46 | 7.56 |
| 10%       |                                | 2.25 | 2.84 | 3.41 | 4.32 | 7.35 |
| 2%        |                                | 2.13 | 2.66 | 3.23 | 4.13 | 7.01 |

**Supplementary Table 3 | Wearable macroscope optical design tolerancing analysis.** RMS spot radius across the FOV, calculated by the Monte Carlo tolerance analysis after 10,000 trials. Units are in  $\mu\text{m}$ . The top half of the table shows Nominal, Best, and Worst cases and the Mean and Standard Deviation of RMS spot radii across all trials. The bottom half of the table shows the RMS spot radii at a given yield, which is equivalent to the statistical percentile (i.e., 50% yield means 50% of the runs had an RMS spot radius smaller or equal to the values given in the table).
